# Supplementary material for: Erythrocyte P2X1 receptor expression is correlated with change in haematocrit in patients admitted to the ICU with blood pathogen-positive sepsis
Source: Springer Nature journal article supplement (doi:10.1186/s13054-018-2100-3), 2018-08-02
Supplement: MOESM1 [file 15997176]

# Additional file 1

□ **Original study population:** 276 patients with confirmed sepsis in database. Pregnant patients, and patients under 18 years of age excluded at enrolment

□ **This study:** 41 eligible patients with whole blood stored in biobank and records registered in REDcap

- 4 Patients excluded due to medical history of anaemia
- 1 Patient excluded due to trauma as cause of admission
- 2 Patients excluded due to suffering from known hereditary or cancerous blood disease

□ 34 patients samples included in study population

□ 20 patients negative for blood pathogen

□ 14 patients positive for blood pathogen

Additional file 1

Patient selection flow chart
