# Supplementary material for: Erythrocyte P2X1 receptor expression is correlated with change in haematocrit in patients admitted to the ICU with blood pathogen-positive sepsis
Source: Springer Nature journal article supplement (doi:10.1186/s13054-018-2100-3), 2018-08-02
Supplement: MOESM2 [file 15997176]

## Additional file 2-verification of antibodies

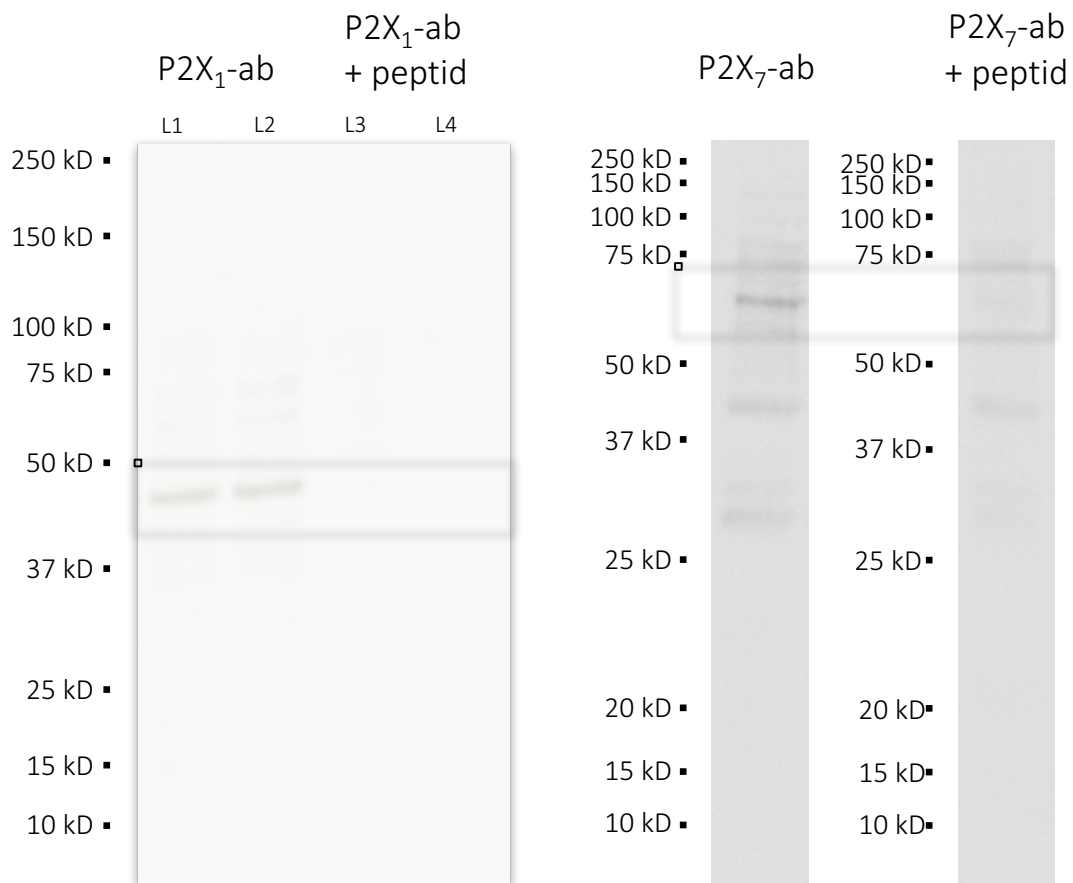

### Additional file 2

Immuno-blot with the P2X<sub>1</sub> and P2X<sub>7</sub> antibodies used for flow cytometric detection of the P2 receptors on the erythrocytes, with or without peptide preadsorption.
